# Supplementary material
Source: MDPI journal article supplement (https://www.mdpi.com/2077-1312/12/5/787)

**Table S1.** The corresponding table of degenerate bases and common bases in the prime.

| Degenerate bases | Corresponding base |
|------------------|--------------------|
| R                | A/G                |
| Y                | C/T                |
| M                | A/C                |
| K                | G/T                |
| S                | G/C                |
| W                | A/T                |
| H                | A/T/C              |
| B                | G/T/C              |
| V                | G/A/C              |
| D                | G/A/T              |
| N                | A/T/C/G            |

**Table S2.** The water temperature, salinity, pH and the dissolved oxygen (DO) concentration in the sampling ponds of WD and CY.

|     | T(°C)    | pH        | Do(mg/L)  | S(g/L) |
|-----|----------|-----------|-----------|--------|
| WD1 | 29.3±0.1 | 8.13±0.05 | 6.03±0.05 | 30±0.4 |
| WD3 | 30.1±0.7 | 7.58±0.23 | 6.30±0.13 |        |
| WD5 | 29.2±0.0 | 7.54±0.19 | 5.74±0.26 |        |
| WD7 | 27.0±0.2 | 7.63±0.21 | 5.94±0.16 |        |
| WD9 | 24.9±0.6 | 7.47±0.19 | 4.79±0.64 |        |
| CY1 | 28.2±0.6 | 8.26±0.01 | 5.99±0.11 | 25±0.5 |
| CY3 | 29.5±0.7 | 8.02±0.13 | 5.67±0.16 |        |
| CY5 | 28.6±0.6 | 7.96±0.02 | 5.53±0.05 |        |
| CY7 | 27.8±0.2 | 7.83±0.11 | 5.84±0.12 |        |
| CY9 | 28.5±0.3 | 7.86±0.09 | 5.67±0.19 |        |

**Table S3.** The results of the statistical analysis of the abundance of nitrogen cycling genes in the WD group.

| Gene        | Homogeneity<br>of variance | One-way ANOVA |          | Nonparametric tests<br><i>P</i> |
|-------------|----------------------------|---------------|----------|---------------------------------|
|             |                            | F             | <i>P</i> |                                 |
| <i>amoA</i> | 0.115                      | 19.266        | 0.000    |                                 |
| <i>nirS</i> | 0.079                      | 8.513         | 0.001    |                                 |
| <i>nirK</i> | 0.187                      | 16.195        | 0.000    |                                 |
| <i>nxrB</i> |                            |               |          | 0.048                           |
| <i>ureC</i> |                            |               |          | 0.002                           |
| <i>narG</i> |                            |               |          | 0.003                           |
| <i>napA</i> |                            |               |          | 0.012                           |

**Table S4.** The results of the statistical analysis of the abundance of nitrogen cycling genes in the CY group.

| Gene        | Homogeneity<br>of variance | One-way ANOVA |   | Nonparametric tests |
|-------------|----------------------------|---------------|---|---------------------|
|             |                            | F             | P | P                   |
| <i>amoA</i> |                            |               |   | 0.008               |
| <i>nirS</i> |                            |               |   | 0.010               |
| <i>nirK</i> |                            |               |   | 0.057               |
| <i>nxrB</i> |                            |               |   | 0.014               |
| <i>ureC</i> |                            |               |   | 0.001               |
| <i>narG</i> |                            |               |   | 0.009               |
| <i>napA</i> |                            |               |   | 0.029               |

**Figure S1.** Changes in the body lengths of the shrimps in WD and CY during sampling.

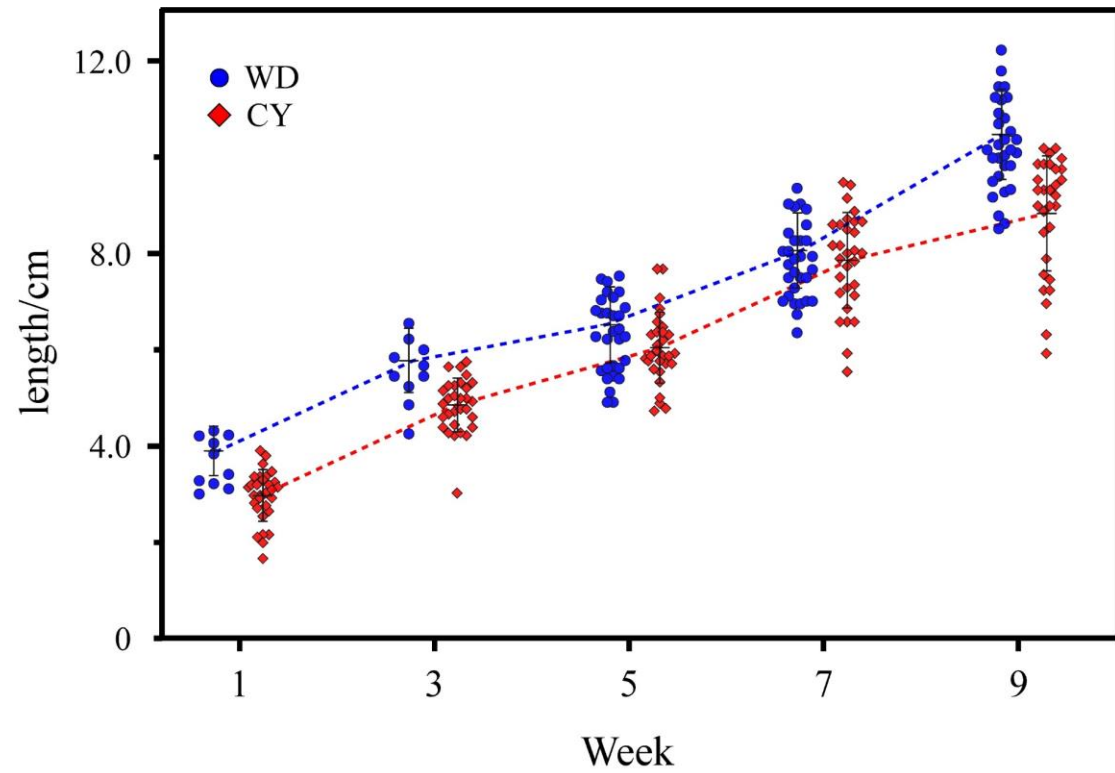

**Figure S2.** Difference analysis of microbial communities of WD and CY at the same sampling time (family level). a: Week 1, b: Week 3, c: Week 5, d: Week 7, e: Week 9.

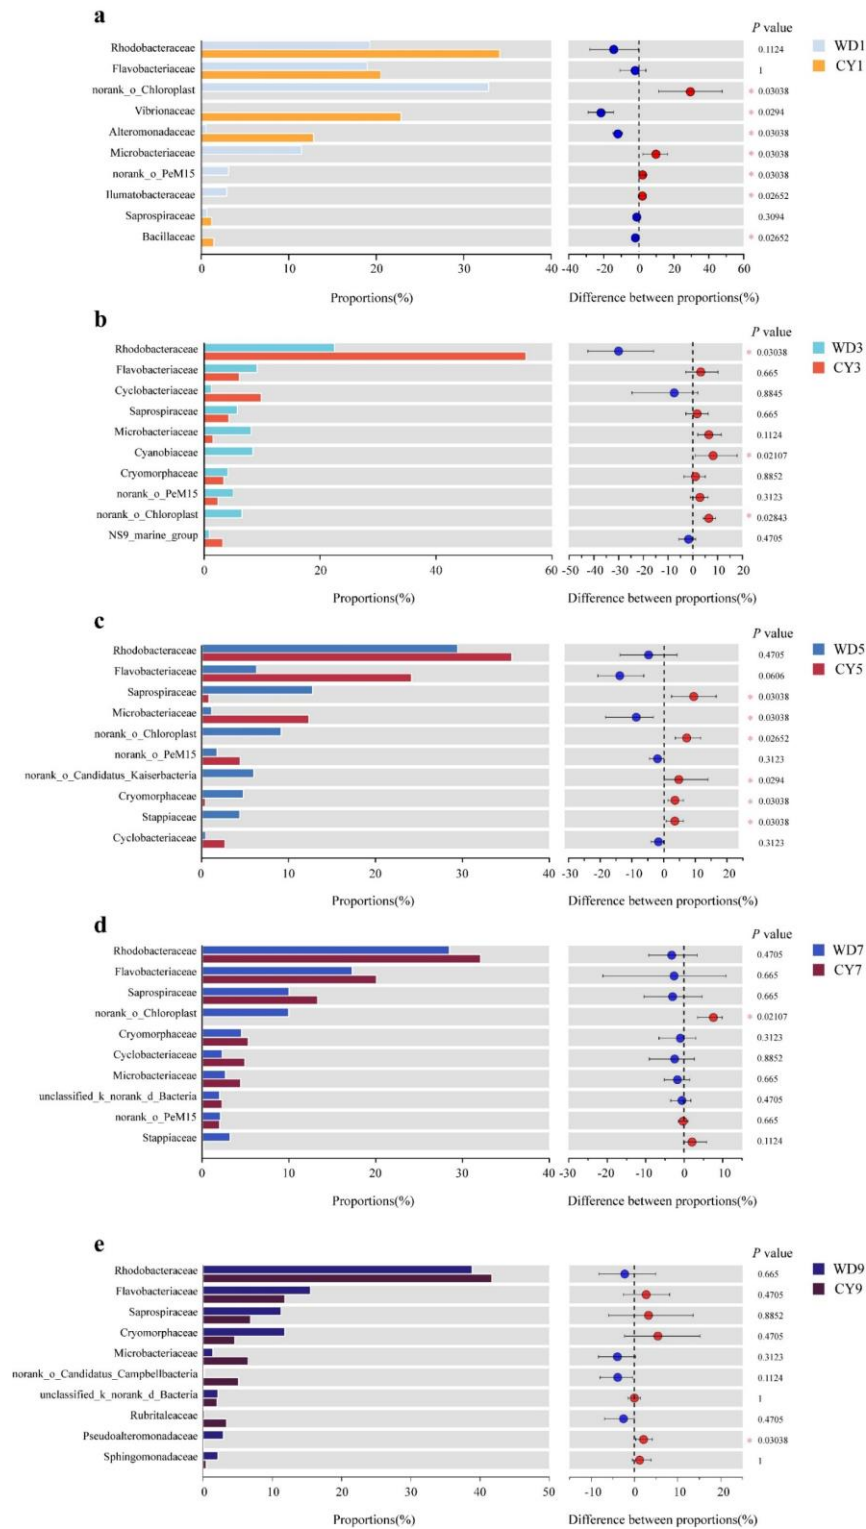

**Figure S3.** C/N ratio of water in the WD group and CY group during culture.

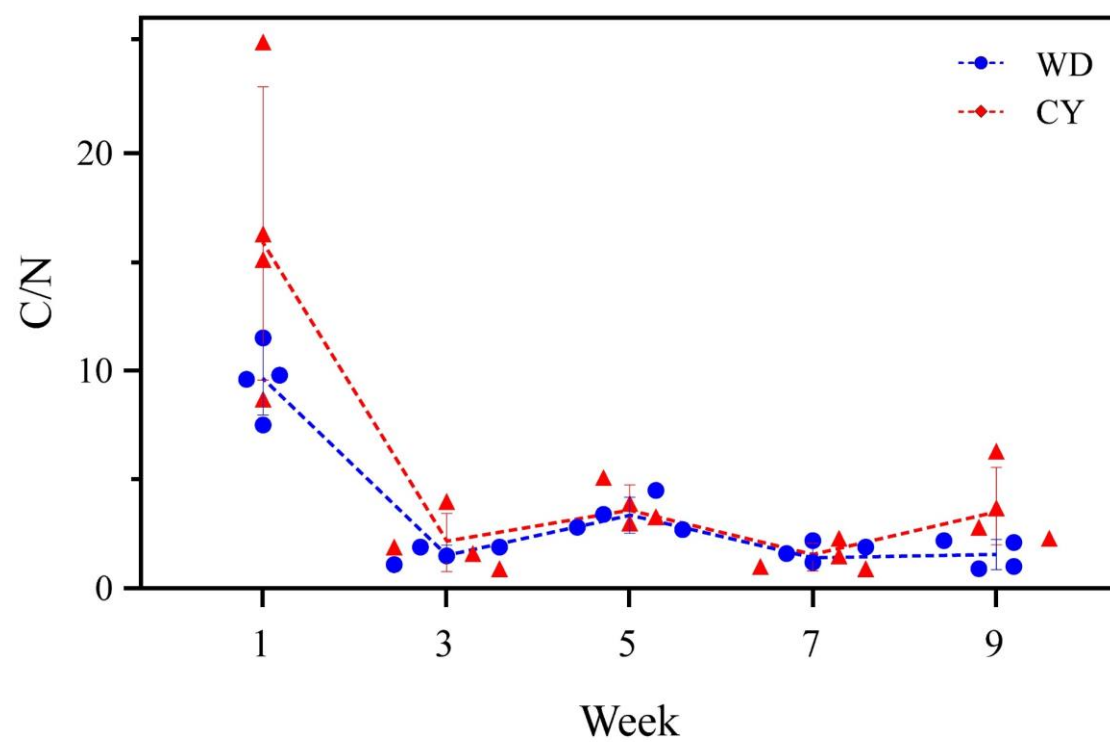

**Figure S4.** The concentrations of nitrogen compounds in the WD group and CY group. The left Y-axis represents the concentrations of TAN,  $\text{NO}_2^-$ -N and  $\text{NO}_3^-$ -N; the right is the concentration of TN.

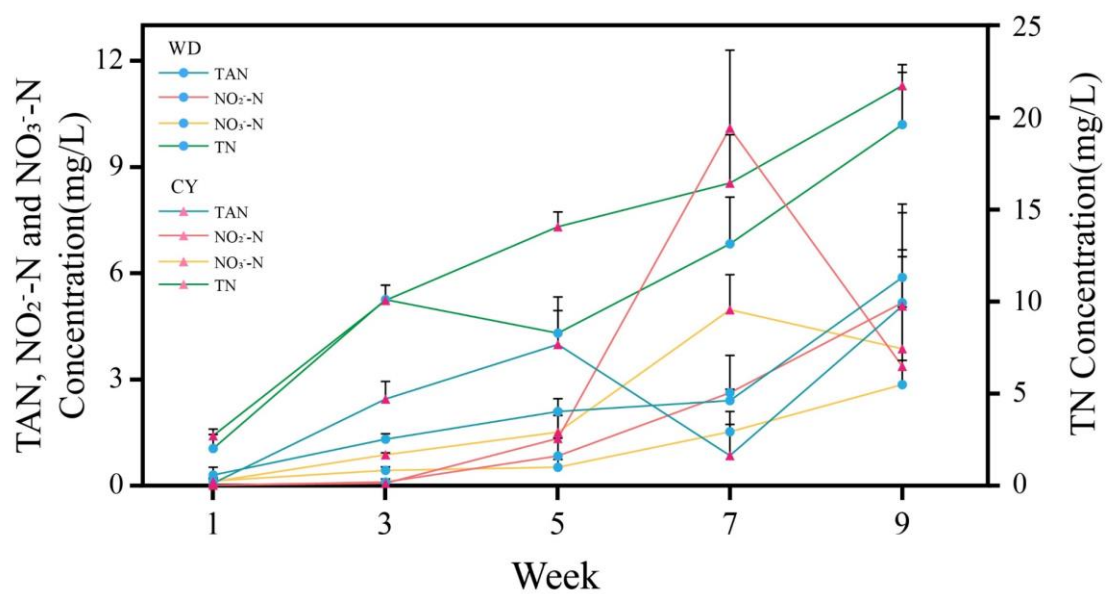

Supplement: s1 [file s1]
